1           **Acute memory deficits in chemotherapy-treated adults**

2           Oana C. Lindner<sup>a\*</sup>, Andrew Mayes<sup>a</sup>, Martin G. McCabe<sup>b</sup>, Deborah Talmi<sup>a</sup>

3

4

5           <sup>a</sup>Division of Neuroscience and Experimental Psychology, School of Biological  
6 Sciences, University of Manchester, Zochonis building, Oxford Road, Manchester, M139PL.

7           <sup>b</sup>Division of Molecular & Clinical Cancer Sciences, Faculty of Biology, Medicine and  
8 Health, University of Manchester

9           \*Corresponding author: Oana C. Lindner, Patient Centred Outcomes Research Group,  
10 Level 3, Bexley Wing, St. James's Institute of Oncology, Beckett Street, Leeds, LS8 7TF;  
11 Tel: +44(0)113. 206. 7580; Email: [o.c.lindner@leeds.ac.uk](mailto:o.c.lindner@leeds.ac.uk) orcid.org/0000-0001-5442-8393

12

13

14           Deborah Talmi [Deborah.talmi@manchester.ac.uk](mailto:Deborah.talmi@manchester.ac.uk) orcid.org/0000-0002-7720-2706

15           Andrew Mayes [Andrew.Mayes@manchester.ac.uk](mailto:Andrew.Mayes@manchester.ac.uk)

16           Martin McCabe [Martin.McCabe@manchester.ac.uk](mailto:Martin.McCabe@manchester.ac.uk)

17           Conflict of interest statement: No conflicts of interest to declare.

18           Word count:8033

19

1           **Abstract**

2           Data from research on amnesia and epilepsy are equivocal with regards to the  
3 dissociation, shown in animal models, between rapid and slow long-term memory  
4 consolidation. Cancer treatments have lasting disruptive effects on memory and on brain  
5 structures associated with memory, but their acute effects on synaptic consolidation are  
6 unknown. We investigated the hypothesis that cancer treatment selectively impairs slow  
7 synaptic consolidation. Cancer patients and their matched controls were administered a novel  
8 list-learning task modelled on the Rey Auditory-Verbal Learning Test. Learning, forgetting,  
9 and retrieval were tested before, and one day after patients' first chemotherapy treatment.  
10 Due to difficulties recruiting cancer patients at that sensitive time, we were only able to study  
11 10 patients and their matched controls. Patients exhibited treatment-dependent accelerated  
12 forgetting over 24 hours compared to their own pre-treatment performance and to the  
13 performance of control participants, in agreement with our hypothesis. The number of  
14 intrusions increased after treatment, suggesting retrieval deficits. Future research with larger  
15 samples should adapt our methods to distinguish between consolidation and retrieval causes  
16 for treatment-dependent accelerated forgetting. The presence of significant accelerated  
17 forgetting in our small sample is indicative of a potentially large acute effect of chemotherapy  
18 treatment on forgetting, with potentially clinically-relevant implications.

19

20

21           *Key words:* memory, forgetting, cognition, cancer, chemotherapy

22

## 1           **Introduction**

2           Many believe that early long-term memory (LTM) is initiated by rapid consolidation  
3 triggered at encoding and that it lasts between ten minutes and several hours (Kandel, Dudai,  
4 & Mayford, 2014; McGaugh, 2000). More slowly-triggered consolidation then enables  
5 memories to last for hours, days, or longer (Wixted, 2004). Research in animal models has  
6 revealed double dissociations between rapid and slow consolidation and provided substantial  
7 evidence that drug-induced de-novo protein synthesis disruption impairs slow consolidation  
8 and accelerates forgetting over 24 hours (Kandel et al., 2014; McGaugh, 2000). By contrast,  
9 there is only sparse evidence for dissociation between fast and slow consolidation in humans.  
10 Here we report results from the first study of the cognitive effects of acute cancer  
11 chemotherapy treatment in humans, providing preliminary for this dissociation.

12           The canonical human memory literature does not currently distinguish between  
13 minutes-long ‘early’ and hours-or-days long ‘delayed’ LTM. This is partly because human  
14 forgetting curves (which depict performance on LTM tests as a function of time since  
15 encoding) are typically monotonically decreasing, and described well by a power function  
16 (Kahana & Adler, 2002; Rubin et al., 1996; Wixted, 1990). The single dissociation between  
17 early and delayed LTM is well established. There is ample evidence that the hippocampus is  
18 key to memory persistence, although exactly what that entails is still actively debated  
19 (Carlesimo, Cherubini, Caltagirone, & Spalletta, 2010; Dewar, Della Sala, Beschin, &  
20 Cowan, 2010; Gershman, Blei, & Niv, 2010; Hardt, Nader, & Nadel, 2013; Kopelman et al.,  
21 2007; Mayes & Roberts, 2001). Damage to the hippocampus, other medial temporal lobe  
22 structures and their connections, leads to an accelerated loss of the ability to freely recall  
23 recent inputs. Free recall performance is decreased when tested within the first ten minutes,  
24 after which free recall is usually poor (Isaac & Mayes, 1999a, 1999b). Evidence for the

1 reverse dissociation is less well-established. Some patients with temporal lobe epilepsy show  
2 normal free recall within the first ten minutes after encoding, but accelerated long-term  
3 forgetting (ALF) as indicated by free-recall measures in delayed tests (Alber, Della Sala, &  
4 Dewar, 2014; Elliott, Isaac, & Muhlert, 2014; Hoefeijzers, Dewar, Della Sala, Butler, &  
5 Zeman, 2015; Isaac & Mayes, 1999a, 1999b). The strength of these dissociations between  
6 organic amnesia and ALF is disputed, but if replicated, these findings support a distinction  
7 between human rapid and slow LTM consolidation.

8         Determining whether there is more than one kind of consolidation in humans might be  
9 helped by directly manipulating the putative neurobiological processes, using distinct  
10 pharmacological treatments. Clearly, we cannot administer drugs to humans that may cause  
11 amnesia. In this study, we took a novel approach to address this challenge, by examining, for  
12 the first time, rapid and slow consolidation in non-Central Nervous System (nCNS) cancer  
13 patients who have undergone chemotherapy.

14         Cancer chemotherapy treatments are interesting for the study of memory  
15 consolidation for two reasons. First, chemotherapy treatment involves the delivery of drugs  
16 that are very toxic to humans. While not all cytotoxic drugs cross the blood-brain barrier, pro-  
17 inflammatory cytokines that are triggered by the treatment can reduce the protective  
18 capabilities of the barrier, allowing some of the cytotoxic drugs to cross it (Coussens &  
19 Werb, 2002; Pan et al., 2011; Terrando et al., 2010). The CNS effects of cytotoxic drugs may  
20 be due to the disruption of the blood-brain barrier itself, increase of cytokine expression in  
21 the CNS, or oxidative stress (Ahles & Saykin, 2007; Seigers & Fardell, 2011). For instance,  
22 while anthracyclines do not readily cross the blood-brain barrier (da Ros et al., 2015), in  
23 animals they have nevertheless been linked to apoptosis, inhibition of neuro- and gliogenesis

1 (Dietrich, Prust, & Kaiser, 2015; Kaiser, Bledowski, & Dietrich, 2014), and reductions in  
2 serotonin-induced long-term synaptic facilitation, required for the activation of LTM  
3 consolidation processes (Liu, Zhang, Coughlin, Cleary, & Byrne, 2014). These  
4 neurobiological effects have consequences for memory; for example, suppression of  
5 neurogenesis in the medial temporal lobe disrupts hippocampus-dependent memories  
6 (Arruda-Carvalho, Sakaguchi, Akers, Josselyn, & Frankland, 2011; Luu et al., 2012; Sahay et  
7 al., 2011; Zhang, Zou, He, Gage, & Evans, 2008). Indeed, research in animals shows that  
8 even the first chemotherapy treatment impairs memory; impairments can increase in severity  
9 as treatment progresses (Rzeski et al., 2004) and are associated with neuronal damage  
10 (Dietrich et al., 2015; Kaiser et al., 2014).

11         Second, although the acute effects of cancer chemotherapy treatment on memory are  
12 not known, it is well established that cancer survivors treated with chemotherapy exhibit  
13 chronic structural and functional brain damage and cognitive difficulties. This literature is  
14 heterogeneous, but most cross-sectional behavioural studies, recent longitudinal studies  
15 (Janelsins, Kesler, Ahles, & Morrow, 2014), and structural and functional imaging evidence  
16 (de Ruiter & Schagen, 2013; Deprez, Billiet, Sunaert, & Leemans, 2013; Pomykala, de  
17 Ruiter, Deprez, McDonald, & Silverman, 2013) have consistently demonstrated  
18 chronic impairments in memory, executive functions, and the brain regions that subserve them.  
19 Declarative memory is one of the cognitive functions most frequently affected (Lindner et al.,  
20 2014; Saykin, de Ruiter, McDonald, Deprez, & Silverman, 2013). Crucially, these  
21 behavioural markers and structural/functional brain changes are independent of anxiety,  
22 depression, or any other patient-reported outcomes.

1           Taken together, cancer chemotherapy treatment is thought to induce changes in the  
2 brain that impair memory acutely and chronically. This presents an interesting opportunity to  
3 study consolidation causally, under controlled conditions, in a population without  
4 neurological or psychiatric history. Beyond this theoretical interest, evidence for the acute  
5 cognitive effects of chemotherapy has obvious clinical relevance, with potential impact on  
6 patient-doctor communication practices. The reason the effects of acute chemotherapy on  
7 cognition have not been studied until now has to do with the obvious challenges of  
8 conducting experiments during a very sensitive time for patients, within weeks after  
9 diagnosis and around the onset of a difficult treatment. We report the results of a small study,  
10 with 10 non-CNS cancer patients (and their matched controls) where we examined 2-minute  
11 and 24-hour delayed memory before, and immediately after patients' very first chemotherapy  
12 treatment. We hypothesised that patients will exhibit accelerated forgetting following their  
13 first treatment, both relative to their pre-treatment performance and to that of matched  
14 controls. We suspected that cancer treatment may disrupt de-novo protein synthesis and  
15 hence impede slower memory consolidation whether or not learning and/or retrieval are also  
16 disrupted. Our results suggest that slow consolidation is impaired in this group, in agreement  
17 with our hypothesis, but the small sample size means that they can only be considered  
18 preliminary. We report them in order to encourage larger studies of this topic.

## 19           **Methods**

### 20           **Participants**

21           The study was approved by the National Research Ethics Services Committee North  
22 West. Exclusion criteria common to all participants included a previous history of cancer  
23 and/or chemotherapy, hormonal treatment, cranial irradiation, brain injury, a history of

1 mental health problems or substance abuse, previously exposed to mood altering drugs, or if  
2 they were not proficient in English.

3 *Patients.* Cancer patients were recruited to the study between November 2011 and  
4 April 2014. Patients were approached by their clinical team if they were between 16 and 50  
5 years old and had been diagnosed with one of four cancers most prevalent in working  
6 ageyoung and middle aged adults (CRUK, 2014): sarcoma, lymphoma, breast cancer, or germ  
7 cell tumour. Because the mechanism with which cytotoxic drugs disrupt the CNS are varied  
8 and ultimately not yet known, and because most chemotherapy regimens involve the  
9 administration of multiple cytotoxic agents, we did not limit inclusion to patients receiving  
10 drugs known to cross the blood brain barrier. To be included in the study, patients had to be  
11 available to be evaluated before their adjuvant or neoadjuvant treatment.

12 Figure 1 depicts the recruitment process. The self-exclusion of unwell patients  
13 suggests that the participants who completed Session 3 may have had a better health and  
14 emotional status compared to decliners. Due to logistical difficulties, three participants could  
15 not be tested using a computer in either Sessions 2 or 3. To be cautious, the final sample only  
16 includes patients who were tested on the computerised version of the task, but we also  
17 comment on any differences between the analyses of the two samples. All patients in the final  
18 sample had received antiemetics as part of their first treatment. None had additional medical  
19 co-morbidities. All women were pre-menopausal. There were no differences in the  
20 distribution of diagnoses, demographic details, neuropsychological characteristics, or patient-  
21 reported outcomes between the patients who took part in this study and those who did not  
22 (Supplementary Tables S1-S2).

1           *Controls.* Control participants (N=10), recruited through adverts, were matched to  
2 patients on education, sex, and age (+/- 5 years). There were no significant differences  
3 between participants on any demographic variables (Table 1).

4           **Insert Figure 1**

5           **Insert Table 1**

6           **Instruments**

7           *Word lists.* Five different word lists were created in a pilot study using 60 young  
8 adults. The words consisted of concrete nouns from the Snodgrass and Vanderwart (1980)  
9 database. To limit proactive interference and list confusions each list contained 24 words  
10 from two categories representing one natural and one man-made concept. Category names  
11 were used as semantic cues for free recall in the beginning of each Session. Lists were  
12 equivalent in familiarity and word frequency and were 4-10 letters in length (Supplementary  
13 Table S3). The first two letters of each word were unique and served as a cue in the cued  
14 recall test. Three lists were selected for each patient and one list allocated to each Session  
15 through a balanced Latin square method (Reese, 1997).

16           *Distracter task.* The task consisted of two similar pictures containing 15 differences.  
17 Participants were asked to find as many differences as they could within 2 minutes.

18           *Additional tests.* Education is often used as a proxy of general intellectual  
19 performance to enable matching between groups (Neisser et al., 1996), although this may not  
20 be sufficient in between-group cognitive studies (Deary & Johnson, 2010). Following on  
21 from the discussion in Lindner et al. (2014) we attempted to match the groups better by  
22 measuring full-scale IQ through the Wechsler Test of Adult Reading (WTAR, Strauss et al.,



1 2006), a good estimate general cognitive functioning. To control for potential confounders  
2 and adhere to the recommendations of the International Cognition and Cancer Task Force  
3 (ICCTF, Wefel et al., 2011) we attempted to evaluate patients' neuropsychological status  
4 with standardised measures. We also asked participants to fill in several questionnaires at  
5 home and send them back to us in a self-addressed envelope. Logistic difficulties, inherent to  
6 clinical settings, meant that not all patients were able to complete all the neuropsychological  
7 and patient-reported outcomes measures. Available results (Supplementary Table S2) suggest  
8 that our sample generally exhibited low level of emotional distress, and were not very  
9 different from controls on learning and memory measures. All participants completed the  
10 WTAR, which we were therefore able to include as a covariate in the analyses.

## 11 **Procedure**

12 A difficulty in carrying out repeated memory tests in clinical settings is that  
13 instruments recommended in neuropsychological studies of cancer patients (Vardy, Wefel,  
14 Ahles, Tannock, & Schagen, 2008) cannot longitudinally assess forgetting across a 24-hour  
15 period, a feature we particularly wanted to examine. To address this, we designed a new  
16 word-learning task. The specific testing procedure, has a strong theoretical justification to  
17 enable the investigation of learning, forgetting, and retrieval processes. Figure 2 provides a  
18 graphical summary of the procedure. The task was administered in three Sessions, one per  
19 day, over three consecutive days. Patients received the first treatment after the first two  
20 Sessions and before the third. Sessions were short (10-15 minutes) to facilitate the  
21 administration of this non-routine test before and after patients' first treatment.

22 The task was modelled after the Rey Auditory Verbal Learning Test (RAVLT,  
23 Strauss, Sherman, Spreen, & Spreen, 2006). It was short and flexible enough to be

1 administered to patients before and immediately after their first treatment, and sensitive  
2 enough to capture and differentiate between potentially mild learning, consolidation, and  
3 retrieval deficits, which could all underlie impaired memory (Mayes, 1995; Mayes &  
4 Roberts, 2001). The differences between our task and RAVLT were the use of categorised  
5 words (limiting interference in a delayed recall context); the increased number of items and  
6 reduced number of learn/recall trials (limiting ceiling effects); the inclusion of an unrelated  
7 distracter task before the final free recall (limiting recall from working memory and potential  
8 interference inherent to verbal tasks); and the use of a cued recall test to tap into memory  
9 performance under aided retrieval conditions (avoiding potential ceiling effects expected in a  
10 recognition test). The exact instructions used for each session are provided in the  
11 Supplementary Material.

## 12 **Insert Figure 2**

13 In each Session, each word list was studied, tested through free recall, studied again,  
14 and tested again through free recall. During study, each word was presented on a screen for  
15 2.5 seconds. Participants produced a sentence out loud with the target word (e.g. “The  
16 **helicopter** is in the sky”), after which they pressed a key to proceed to the next word.  
17 Sentences were not recorded but participants adhered to the specific task instruction of not  
18 using the same sentence for different words; sentences could be the same for each learning  
19 occasion. Recall trials were terminated if participants stopped verbally recalling items for  
20 more than 20 seconds. The experimenter recorded both the words and intrusions produced by  
21 participants. After the second free-recall test, the list was studied a third time, the distractor  
22 task was administered, and the list was tested again. Memory for each list was tested a fourth

1 time in the next Session, 24 hours later. Finally, each list was tested for the fifth time with  
2 cued recall.

3 *Testing flexibility.* Evaluations were performed non-routinely and at a sensitive time  
4 for patients hence they had to be flexible, while maintaining an appropriate experimental  
5 control. Patients and controls completed the task either in the hospital (university,  
6 respectively) or at home, while using the same procedures (i.e. if a patient was tested at  
7 home in Session 2 they were matched to a control who was also tested at home). When at  
8 home, participants were tested using a CD on their own computer, while speaking to the  
9 experimenter over the telephone. They entered a code to access the program, ensuring  
10 participants were not exposed to the material prior to testing.

## 11 **Analyses**

12 An accelerated forgetting rate may be present on its own, or together with learning  
13 and/or retrieval deficits. As the focus of this study is on forgetting, we will discuss that  
14 measure first. Raw task performance scores are provided in supplementary Table S4.

15 *Forgetting.* Consolidation disruptions could be measured as an increase in forgetting  
16 rates (Averell & Heathcote, 2011; Wixted, 2004). It is difficult to interpret the raw number of  
17 words forgotten without accounting for how many words were remembered initially (Loftus et  
18 al., 1985). Consider two participants who recall 10 and 15 words in the early test, and 5 and  
19 10 in the late test. Both forgot 5 words, representing 50% and 33% of the words initially  
20 recalled by the first and second participant, respectively. Forgetting rates were computed by  
21 dividing the number of words recalled in the later test by the number of words recalled in the  
22 earlier test, multiplied by 100. This measure compensates for initial recall levels and their  
23 potential drivers, including contextual emotional distress, learning problems, or difficulties

1 with working memory, attention and concentration, factors which are therefore unlikely to  
2 affect forgetting rates.

3 Changes in rapid consolidation were explored by measuring *immediate forgetting*  
4 *rates*, namely, the difference between the second and third recall tests before (Session 2,  
5 (FR23-FR22)/FR22\*100) and after treatment (Session 3, (FR33-FR32)/FR32\*100). Changes  
6 in slow consolidation were explored by measuring *delayed forgetting rates*, namely the  
7 difference between the third and fourth recall tests, which were separated by 24 hours: once  
8 when both the study and the test occurred before treatment (Session 2 vs. Session 1, (FR14-  
9 FR13)/FR13\*100) and once when study occurred before treatment, but test occurred after  
10 treatment (Session 3 vs. Session 2, (FR24-FR23)/FR23\*100).

11 *Learning.* Learning scores were computed by averaging the percentage of words  
12 recalled in the two immediate free-recall tests of the same list. Two learning scores were  
13 computed: before treatment (Session 2, averaging FR21 and FR22) and after treatment  
14 (Session 3, averaging FR31 and FR32).

15 *Retrieval.* Retrieval indices included retrieval scores and intrusions. Retrieval deficit  
16 were suggested if cued recall improved performance relative to free recall more in patients  
17 than in controls, because cued recall reduces the need for organised search during retrieval by  
18 providing an aid. Scores were computed as the proportion of stimuli retrieved in the delayed  
19 cued recall relative to the preceding delayed free recall test, multiplied by 100. Two retrieval  
20 scores were computed: before treatment (Session 2, (CR15-FR14)/FR14\*100) and after  
21 treatment (Session 3, (CR25-FR24)/FR24\*100). Similarly to forgetting rates, the retrieval  
22 scores cannot be affected by initial learning difficulties, although lower retrieval scores could  
23 indicate problems with executive control. Excessive intrusions could suggest non-adherence

1 to task instructions and a potential frontal-dependent memory disruption (Baddeley &  
2 Wilson, 1988).

3 *Statistical analysis.* Learning, immediate and delayed forgetting rates, and delayed  
4 retrieval rates were normally distributed, as evaluated with the Shapiro-Wilk test (Shapiro,  
5 Wilk, & Chen, 1968). Data was analysed with repeated ANOVAs with the factors Group  
6 (patients/controls) and Session (before/after treatment). For brevity, only significant results  
7 are reported ( $p < .05$ ). We examined forgetting with two planned one-tailed t-tests of the  
8 difference between patients and controls following treatment, and for the difference between  
9 patients before and after treatment. For all normally distributed data we report Hedge's  $g$   
10 effect size and its corresponding 95% confidence interval (CI, Borenstein, Hedges, Higgins,  
11 & Rothstein, 2009). Intrusions produced before and after treatment were not normally  
12 distributed, and were analysed with Mann-Whitney tests.

13 *Statistical Power.* Recruitment difficulties reduced our planned sample substantially.  
14 We hence ran a compromise power analysis, in which the power is evaluated as a function of  
15 effect size (set at minimum .20), sample size ( $N=10$  per group), and an error-probability ratio  
16 ( $\beta/\alpha$ ) of 1 (i.e. equal probability of obtaining a difference through error or otherwise). It  
17 yielded a 71% probability of detecting small differences in our sample and a 61% probability  
18 to detect small differences if one covariate were included in the analysis (Faul, Erdfelder,  
19 Lang, & Buchner, 2007).

## 20 **Results**

21 *Group characteristics.* The three sessions took place approximately 24 hours apart.  
22 There were no differences between groups on session-to-session intervals (first delay,

1  $t_{18}=1.95, p>.05$ ; second delay,  $t_{18}=-.12, p>.05$ ). On the distracter task, no participant in either  
2 group identified all the differences in the allocated time.

3 Matching groups on education resulted in an equal number of controls and patients  
4 with college or university degrees. Despite that, patients had a lower FSIQ than controls,  
5 albeit still in the normal range ( $t_{18}=-3.02, p<.01$ ). Because these scores have a moderate  
6 relationship with the Memory Quotient of the Wechsler Memory Scale, the lower score in  
7 patients could give rise to impairment in our task. By controlling for FSIQ, we account for  
8 any potential a-priori performance disadvantages in patients relative to controls. Similarly,  
9 covarying FSIQ could remove important variance because of these expected correlations  
10 (Miller & Chapman, 2001). We therefore report analyses with and without FSIQ as a  
11 covariate.

12 For information purposes only, supplementary Table S2 describes the  
13 neuropsychological performance of the final sample of patients versus controls. Available  
14 pre-treatment results suggest that, as expected, patients may have experienced difficulties in  
15 working memory and concentration as previously reported in pre-treatment cancer  
16 patients (Cimprich et al., 2005). Also expected was the absence of group differences on  
17 memory measures prior to treatment. Notably, the forgetting scores that we report below  
18 were computed to minimise the influence of executive difficulties at the time of encoding by  
19 computing them relative to baseline scores.

20 *Delayed forgetting (a measure of slow consolidation)*. All participants forgot over one  
21 day. Figure 3 depicts a significant interaction between Session and Group ( $F_{1,18}=7, p=.02$ ),  
22 the only significant effect obtained in this analysis. This interaction remained significant  
23 when controlling for FSIQ ( $F_{1,17}=7.20, p=.02$ ). Patients forgot significantly faster than

1 controls after treatment ( $t_{18}=2.64$ ,  $p=.032$ ;  $g=1.13$ , 95% CI= .22 to 2.04). Patients also forgot  
2 more after treatment than before treatment ( $t_9=2.12$ ,  $p=.031$ ;  $g=.75$ , 95% CI = -.11 to 1.62).  
3 Individual participant data, depicted in Figure 3, shows that the patients' accelerated  
4 forgetting after treatment was not a result of outlier results. The same results were obtained in  
5 the extended sample of  $N=13$  patients and their controls. This finding confirms our key  
6 hypothesis that the treatment delivered between the learning session and the delayed retrieval  
7 session would result in accelerated forgetting.

8 **Insert Figure 3**

9 *Immediate forgetting (a measure of rapid consolidation).* There was no forgetting  
10 across the 2-minute distractor task that separated the second and the third free recall tests in  
11 both the  $N=10$  or  $N=13$  samples; performance on the later test was numerically higher than  
12 performance on the earlier test, possibly due to retrieval practice (Nunes & Karpicke, 2015).  
13 No other effects were significant.

14 *Learning.* There was a significant Group effect ( $F_{1,18}=5.10$ ,  $p=.03$ ), indicative of  
15 learning difficulties in patients, which was maintained when including FSIQ as a covariate  
16 ( $F_{1,17}=4.30$ ,  $p=.05$ ). The same results were obtained in the extended sample of  $N=13$ , but after  
17 controlling for FSIQ the Group effect was only marginally significant,  $p=0.054$ . Note that  
18 forgetting scores could not be affected by these group differences in learning (see Methods).  
19 We have conducted additional analysis of the first and second learning trials in Session 1, and  
20 the first and second learning trials in the Sessions before and after treatment (Sessions 2 and  
21 3). These analyses continued to show a main effect of Group which did not interact with any  
22 of the other factors. Hence, while the performance of patients, across learning trials, was  
23 generally lower than that of controls in all three sessions, we do not have evidence that

1 patients failed to benefit to the same degree as controls from additional learning and retrieval  
2 experiences.

3 **Insert Figure 4**

4 *Delayed retrieval.* None of the groups performed at ceiling, although all participants  
5 benefited from cues, suggesting that the cues were appropriate to the task but none of the  
6 effects were significant. The same results were obtained in the extended sample of N=13,  
7 although the interaction between Group and Session was marginally significant before  
8 controlling for FSIQ,  $p=0.06$ .

9 **Insert Figure 5**

10 *Intrusions (a measure of Retrieval).* Patients produced more intrusions than controls, a  
11 difference that was significant after treatment ( $U=16.5$ ,  $p<.01$ ), but not before treatment  
12 ( $U=35.5$ ,  $p=.28$ ). The same results were obtained in the extended sample of N=13. This may  
13 suggest a retrieval deficit, which was not captured by our retrieval score.

14 **Discussion**

15 This is the first investigation of acute memory impairments in nCNS cancer patients.  
16 We report the results of a small study investigating learning, forgetting rates, and retrieval in  
17 patients before and after their first dose of chemotherapy treatment. Recruiting to this  
18 cognitive study within weeks of diagnosis presented formidable challenges, so that over a  
19 period of three years we were only able to recruit a modest sample of 10 patients. Despite the  
20 small sample, the study did reveal three significant differences between patients and controls.



1           Our key finding was a treatment-related modulation of forgetting. After treatment,  
2 patients forgot more over a 24-hour period compared to controls, as measured by free recall.  
3 We also observed a significant increase in the number of intrusions patients produced after  
4 treatment. Finally, patients performed less well than controls on immediate free recall tests  
5 both before and after treatment. We discuss these results below in light of the recruitment  
6 challenges and reflect on how these could be overcome in future studies.

7           Across both pre- and post-treatment testing sessions, patients' ability to learn and  
8 immediately recall what they have learned was poorer compared to that of controls. Previous  
9 work has established that cognitive performance in cancer patients prior to their treatment is  
10 decreased compared to controls (Ahles et al., 2008), with documented poorer attention,  
11 executive functioning, or working memory (Cimprich et al., 2005; Menning et al., 2015).  
12 These deficits could be caused by cancer-related frontal dysfunction (Rabbitt, Lowe, &  
13 Shilling, 2001) or contextual, transient concentration problems due to anxiety (Hermelink et  
14 al., 2015). Anxiety and post-traumatic stress, in particular, have been documented in post-  
15 treatment cancer patients (Hermelink et al., 2015; Stark et al., 2002), and vary in prevalence  
16 and severity along the disease trajectory (Traeger, Greer, Fernandez-Robles, Temel, & Pirl,  
17 2012). Some subclinical, contextual anxiety is expected before treatment (Traeger et al.,  
18 2012), but, in our sample of patients, anxiety was not particularly increased, so it is a less  
19 likely cause for executive deficits. In summary, the learning difficulties patients demonstrated  
20 were independent of treatment and are likely related to deficits in executive functions, which  
21 have been previously documented in post-treatment patients. Importantly, our key measure of  
22 delayed forgetting was independent of initial learning ability, because forgetting rates were  
23 computed relative to immediate memory performance, thus controlling for baseline  
24 performance differences.

1           Our main finding was that, in agreement with our hypothesis, delayed forgetting over  
2 the course of 24 hours was increased in patients after their first treatment compared to  
3 controls and their own pre-treatment performance. The fact that we have demonstrated  
4 significantly accelerated forgetting in a relatively under-powered study suggests that the true  
5 effect size in the population could be large. This is an important finding because delayed  
6 forgetting is thought to be a marker of slow long-term memory consolidation (Hardt et al.,  
7 2013). We could not assess changes in rapid consolidation because our participants did not  
8 forget across a short 2-minute delay. Our finding suggests that cancer chemotherapy may  
9 have acute effects on slow consolidation in humans. This is the first time that cancer  
10 chemotherapy has been shown to have acute cognitive effects and that a drug treatment has  
11 been shown to accelerate human forgetting. If our findings are corroborated in future studies  
12 they could open up a new research avenue that will throw light on the nature of human long-  
13 term memory consolidation.

14           We used a demanding memory test – free recall, because it provides the best marker of  
15 accelerated forgetting in patients with hippocampal damage (Isaac & Mayes, 1999a, 1999b).  
16 Yet the taxing nature of the task could lead to higher forgetting rates in the patient group due  
17 to potential retrieval difficulties, namely difficulties in the executive control of the retrieval  
18 process, rather than impaired consolidation that gives rise to weaker memory traces. To  
19 distinguish between these two possibilities, the task included a measure of the retrieval  
20 process (the degree to which cues facilitated retrieval of the studied material). This measure  
21 did not differ between patients and controls, supporting the interpretation that accelerated  
22 forgetting was caused by impaired slow consolidation rather than retrieval difficulties;  
23 however, given the small sample size as well as the increased number of patient intrusions, null  
24 effects should be interpreted with caution. The second retrieval measure we incorporated

1 (number of intrusions), demonstrated a treatment-dependent increase in patients, indicative of  
2 potential executive control problems after treatment. If patients suffered from impaired  
3 executive control after treatment they may have found it more difficult to access memory  
4 traces, even if they were preserved. Differentiating between the two types of deficits, if at all  
5 possible, would require a different experimental design with hypotheses that would build up  
6 on our findings.

7 Taken together, increased retrieval difficulties after treatment, possibly related to  
8 impaired executive functions, cannot be ruled out as an explanation of the observed  
9 accelerated forgetting after treatment, indicating the need for future work on this topic. In  
10 fact, recent work suggests that poor consolidation and retrieval difficulties are perhaps more  
11 closely intertwined than previously thought. Studies in animal models suggests that protein  
12 synthesis inhibition, which for many years was thought to cause amnesia by impairing slow  
13 consolidation, may not damage the engram cells themselves, but makes it more difficult for  
14 organisms to access those memories during memory tests (Ryan, Roy, Pignatelli, Arons, &  
15 Tonegawa, 2015; Tonegawa, Pignatelli, Roy, & Ryan, 2015).

16 In conclusion, our findings indicate that patients forget faster than controls after their  
17 first treatment either because of treatment-dependent impairment of slow consolidation or  
18 because of retrieval difficulties associated with poorer executive functioning. Future studies  
19 should take special care to differentiate between disruptions to synaptic consolidation in the  
20 medial temporal lobe, and frontally-mediated retrieval problems. This could be explored in  
21 imaging studies by adapting our task to compare changes in free and cued recall in immediate  
22 versus delayed tests and by measuring attention-related imaging markers continuously  
23 throughout the task. Future animal work could build on our findings to decide whether both

1 frontal and medial temporal lobe regions are affected following the first treatment through a  
2 disruption of de novo protein synthesis, necessary in slower consolidation processes.

3 Other factors could be considered in interpreting the accelerated forgetting and the  
4 larger number of intrusions in patients following treatment. First, these findings could be due  
5 to increased emotional distress and fatigue after treatment (Cimprich et al., 2005). Our data  
6 do not allow us to completely rule out this interpretation because many of our patients failed  
7 to return the self-assessment questionnaires aimed at accounting for these effects. That said,  
8 there is no a-priori reason to believe that patients were *more* distressed during the post-  
9 treatment Session 3 than during the pre-treatment Session 2. Future studies should employ  
10 frequent measures of psychological distress. Second, these findings could be related to  
11 concomitantly administered medication, such as corticosteroids, administered for antiemetic  
12 prophylaxis and known to have effects on medial temporal lobe structures as well as  
13 consolidation (Brown, 2009). This possibility is unlikely because post-encoding  
14 administration of cortisol is known to *attenuate* rather than accelerate forgetting (McGaugh,  
15 2002). Finally, these findings could be due to the change of physiological context between  
16 the Sessions. It is possible that memory for materials studied in Session 2 has been associated  
17 with the treatment that was delivered soon afterwards, making it more difficult for patients  
18 than controls to access Session 2 materials during Session 3 (Gisquet-Verrier et al., 2015;  
19 McCullough & Yonelinas, 2013). This possibility is less likely given that the physiological  
20 effects of the drugs would have continued to affect patients during Session 3. Putative effects  
21 of context shifts could be evaluated in future studies by administering a fourth Session and  
22 checking whether forgetting is accelerated also between Session 3 and Session 4. Larger  
23 studies, with a more homogenous treatment regimen, would also help assess context effects  
24 by utilizing designs that are informed by the time-course of drug action.

1           Significant restrictions were imposed from the outset by recruiting patients at an  
2 emotionally stressful time, after diagnosis and before treatment onset. They were also posed  
3 by the general difficulties in recruiting patients to psycho-social oncology studies in the UK  
4 (Ashley et al., 2012), especially for cognitive studies (Shilling, Jenkins, Fallowfield,  
5 &Howell, 2003). Recruitment difficulties meant that despite our best efforts over the course  
6 of three years, we only achieved a final sample of 10 patients. Therefore, although we  
7 attempted to evaluate patients' neuropsychological status and adhere to the recommendations  
8 of the ICCTF (Wefel et al., 2011), not all of our patients completed the battery, and our  
9 interpretation of the memory deficits we observed relies on the pattern of patients'  
10 performance on our central memory task, which had its own in-built controls. Recruitment  
11 challenges could be overcome in future research by investing more in raising awareness  
12 about the scientific evidence for cancer and treatment-dependent cognitive impairments in  
13 survivors. For us, recruitment difficulties were only partly overcome by our simplified and  
14 brief testing procedure and the use of a flexible computerised task. Future studies could look  
15 at further simplifying the delivery of tests by using pencil-and-paper instruments or online  
16 assessments, depending on the demographic of the cancer group. Although our sample size  
17 does not detract, but rather underscores, the magnitude of the significant effects we obtained,  
18 it does mean that we cannot interpret null effects. Clearly, it is critically important to replicate  
19 our findings in more highly powered studies.

20           Despite their limitations, our results are unique in highlighting treatment-related  
21 cognitive deficits in working age cancer patients relative to controls. We hope that our results  
22 will encourage others to pursue large sample investigations of memory processes that will  
23 pinpoint the biological mechanisms underlying acute and long-term structural brain

- 1 treatment-related change in nCNS cancer patients, and encourage the development of
- 2 strategies to mitigate these effects on survivors' lives.
- 3

1           **Acknowledgements.**

2           This work was supported by the Medical Research Council (G1000399). The authors  
3           thank all participants and NHS Trusts who contributed to this study. We also thank M Cohn,  
4           G Winocur and L Fuentemilla, as well as the reviewers for their valuable comments on our  
5           manuscript.

6

1           **References**

- 2   Ahles, T. A., & Saykin, A. J. (2007). Candidate mechanisms for chemotherapy-induced  
3       cognitive changes. *Nature Reviews. Cancer*, 7(3), 192–201.  
4       <http://doi.org/10.1038/nrc2073>
- 5   Ahles, T. A., Saykin, A. J., McDonald, B. C., Furstenberg, C. T., Cole, B. F., Hanscom, B. S.,  
6       ... Kaufman, P. A. (2008). Cognitive function in breast cancer patients prior to adjuvant  
7       treatment. *Breast Cancer Research and Treatment*, 110(1), 143–52.  
8       <http://doi.org/10.1007/s10549-007-9686-5>
- 9   Alber, J., Della Sala, S., & Dewar, M. (2014). Minimizing interference with early  
10       consolidation boosts 7-day retention in amnesic patients. *Neuropsychology*, 28(5), 667–  
11       675. <http://doi.org/10.1037/neu0000091>
- 12   Arruda-Carvalho, M., Sakaguchi, M., Akers, K. G., Josselyn, S. A., & Frankland, P. W.  
13       (2011). Posttraining ablation of adult-generated neurons degrades previously acquired  
14       memories. *The Journal of Neuroscience* □: *The Official Journal of the Society for*  
15       *Neuroscience*, 31(42), 15113–27. <http://doi.org/10.1523/JNEUROSCI.3432-11.2011>
- 16   Ashley, L., Jones, H., Velikova, G., & Wright, P. (2012). Cancer patients' and clinicians'  
17       opinions on the best time in secondary care to approach patients for recruitment to  
18       longitudinal questionnaire-based research. *Supportive Care in Cancer*, 20(12), 3365–  
19       3372. <http://doi.org/10.1007/s00520-012-1518-4>
- 20   Averell, L., & Heathcote, A. (2011). The form of the forgetting curve and the fate of  
21       memories. *Journal of Mathematical Psychology*, 55(1), 25–35.  
22       <http://doi.org/10.1016/j.jmp.2010.08.009>



- 1 Baddeley, A., & Wilson, B. Frontal amnesia and the dysexecutive syndrome., 7Brain and  
2 cognition 212–230 (1988). [http://doi.org/10.1016/0278-2626\(88\)90031-0](http://doi.org/10.1016/0278-2626(88)90031-0)
- 3 Borenstein, M., Hedges, L. V., Higgins, J. P. T., & Rothstein, H. R. (2009). *Introduction to*  
4 *Meta-Analysis*. Chichester, UK: John Wiley & Sons, Ltd.  
5 <http://doi.org/10.1002/9780470743386>
- 6 Brearley, S. G., Stamatakis, Z., Addington-Hall, J., Foster, C., Hodges, L., Jarrett, N., ...  
7 Amir, Z. (2011). The physical and practical problems experienced by cancer survivors:  
8 A rapid review and synthesis of the literature. *European Journal of Oncology Nursing*,  
9 *15*(3), 204–212. <http://doi.org/10.1016/j.ejon.2011.02.005>
- 10 Brown, E. S. (2009). Effects of glucocorticoids on mood, memory, and the hippocampus.  
11 Treatment and preventive therapy. *Annals of the New York Academy of Sciences*, *1179*,  
12 41–55. <http://doi.org/10.1111/j.1749-6632.2009.04981.x>
- 13 Carlesimo, G. A., Cherubini, A., Caltagirone, C., & Spalletta, G. (2010). Hippocampal mean  
14 diffusivity and memory in healthy elderly individuals: A cross-sectional study.  
15 *Neurology*, *74*(3), 194–200. <http://doi.org/10.1212/WNL.0b013e3181cb3e39>
- 16 Cimprich, B., So, H., Ronis, D. L., & Trask, C. (2005). Pre-treatment factors related to  
17 cognitive functioning in women newly diagnosed with breast cancer. *Psycho-Oncology*,  
18 *14*(1), 70–78. <http://doi.org/10.1002/pon.821>
- 19 Coussens, L. M., & Werb, Z. (2002). Inflammation and cancer. *Nature*, *420*(6917), 860–7.  
20 <http://doi.org/10.1038/nature01322>
- 21 CRUK. (2014). Cancer survival by age. Retrieved from

- 1 <http://www.cancerresearchuk.org/cancer-info/cancerstats/survival/age/>
- 2 da Ros, M., Iorio, A. L., Lucchesi, M., Stival, A., de Martino, M., & Sardi, I. (2015). The Use  
3 of Anthracyclines for Therapy of CNS Tumors. *Anti-Cancer Agents in Medicinal*  
4 *Chemistry, 15*(6), 721–727.
- 5 de Ruiter, M. B., & Schagen, S. B. (2013). Functional MRI studies in non-CNS cancers.  
6 *Brain Imaging and Behavior, 7*(4), 388–408. <http://doi.org/10.1007/s11682-013-9249-9>
- 7 Deary, I. J., & Johnson, W. (2010). Intelligence and education: causal perceptions drive  
8 analytic processes and therefore conclusions. *International Journal of Epidemiology,*  
9 *39*(5), 1362–9. <http://doi.org/10.1093/ije/dyq072>
- 10 Deprez, S., Billiet, T., Sunaert, S., & Leemans, A. (2013). Diffusion tensor MRI of  
11 chemotherapy-induced cognitive impairment in non-CNS cancer patients: a review.  
12 *Brain Imaging and Behavior, 7*(4), 409–35. <http://doi.org/10.1007/s11682-012-9220-1>
- 13 Dewar, M., Della Sala, S., Beschin, N., & Cowan, N. (2010). Profound Retroactive  
14 Interference in Anterograde Amnesia: What interferes? *Neuropsychology, 24*(3), 357–  
15 367. <http://doi.org/10.1037/a0018207>
- 16 Dietrich, J., Prust, M., & Kaiser, J. (2015). Chemotherapy, cognitive impairment and  
17 hippocampal toxicity. *Neuroscience*. <http://doi.org/10.1016/j.neuroscience.2015.06.016>
- 18 Elliott, G., Isaac, C. L., & Muhlert, N. (2014). Measuring forgetting: A critical review of  
19 accelerated long-term forgetting studies. *Cortex*.  
20 <http://doi.org/10.1016/j.cortex.2014.02.001>

21

- 1 Faul, F., Erdfelder, E., Lang, A.-G., & Buchner, A. (2007). G\*Power 3: a flexible statistical  
2 power analysis program for the social, behavioral, and biomedical sciences. *Behavior*  
3 *Research Methods*, 39, 175–191. <http://doi.org/10.3758/BF03193146>
- 4 Gershman, S. J., Blei, D. M., & Niv, Y. (2010). Context, learning, and extinction.  
5 *Psychological Review*, 117(1), 197–209. <http://doi.org/10.1037/a0017808>
- 6 Gisquet-Verrier, P., Lynch, J. F., Cutolo, P., Toledano, D., Ulmen, A., Jasnow, A. M., &  
7 Riccio, D. C. (2015). Integration of New Information with Active Memory Accounts for  
8 Retrograde Amnesia: A Challenge to the Consolidation/Reconsolidation Hypothesis?  
9 *Journal of Neuroscience*, 35(33), 11623–11633.  
10 <http://doi.org/10.1523/JNEUROSCI.1386-15.2015>
- 11 Hardt, O., Nader, K., & Nadel, L. (2013). Decay happens: the role of active forgetting in  
12 memory. *Trends in Cognitive Sciences*, 17(3), 111–20.  
13 <http://doi.org/10.1016/j.tics.2013.01.001>
- 14 Hermelink, K., Voigt, V., Kaste, J., Neufeld, F., Wuerstlein, R., Bühner, M., ... Harbeck, N.  
15 (2015). Elucidating pretreatment cognitive impairment in breast cancer patients: the  
16 impact of cancer-related post-traumatic stress. *Journal of the National Cancer Institute*,  
17 107(7), djv099-. <http://doi.org/10.1093/jnci/djv099>
- 18 Hoefeijzers, S., Dewar, M., Della Sala, S., Butler, C., & Zeman, A. (2015). Accelerated long-  
19 term forgetting can become apparent within 3-8 hours of wakefulness in patients with  
20 transient epileptic amnesia. *Neuropsychology*, 29(1), 117–25.  
21 <http://doi.org/10.1037/neu0000114>
- 22 Isaac, C. L., & Mayes, A. R. (1999a). Rate of forgetting in amnesia: I. Recall and recognition

- 1 of prose. *Journal of Experimental Psychology: Learning, Memory, and Cognition*,  
2 25(4), 942–962. <http://doi.org/10.1037/0278-7393.25.4.942>
- 3 Isaac, C. L., & Mayes, A. R. (1999b). Rate of forgetting in amnesia: II. Recall and  
4 recognition of word lists at different levels of organization. *Journal of Experimental*  
5 *Psychology. Learning, Memory, and Cognition*, 25(4), 963–977.  
6 <http://doi.org/10.1037/0278-7393.25.4.963>
- 7 Kahana, M., & Adler, M. (2002). Note on the power law of forgetting. ... *of Pennsylvania*,  
8 *Unpublished Note*, (1996), 1–15. Retrieved from  
9 <https://memory.psych.upenn.edu/files/pubs/KahaAdle02.pdf>
- 10 Kaiser, J., Bledowski, C., & Dietrich, J. (2014). Neural correlates of chemotherapy-related  
11 cognitive impairment. *Cortex; a Journal Devoted to the Study of the Nervous System*  
12 *and Behavior*, 54, 33–50. <http://doi.org/10.1016/j.cortex.2014.01.010>
- 13 Kandel, E. R., Dudai, Y., & Mayford, M. R. (2014). The molecular and systems biology of  
14 memory. *Cell*. Cell Press.
- 15 Kopelman, M. D., Bright, P., Buckman, J., Fradera, A., Yoshimasu, H., Jacobson, C., &  
16 Colchester, A. C. F. (2007). Recall and recognition memory in amnesia: Patients with  
17 hippocampal, medial temporal, temporal lobe or frontal pathology. *Neuropsychologia*,  
18 45(6), 1232–1246. <http://doi.org/10.1016/j.neuropsychologia.2006.10.005>
- 19 Lindner, O. C., Phillips, B., McCabe, M. G., Mayes, A., Wearden, A., Varese, F., & Talmi,  
20 D. (2014). A meta-analysis of cognitive impairment following adult cancer  
21 chemotherapy. *Neuropsychology*, 28(5), 726–40. <http://doi.org/10.1037/neu0000064>

- 1 Liu, R.-Y., Zhang, Y., Coughlin, B. L., Cleary, L. J., & Byrne, J. H. (2014). Doxorubicin  
2 attenuates serotonin-induced long-term synaptic facilitation by phosphorylation of p38  
3 mitogen-activated protein kinase. *The Journal of Neuroscience* □: *The Official Journal*  
4 *of the Society for Neuroscience*, 34(40), 13289–300.  
5 <http://doi.org/10.1523/JNEUROSCI.0538-14.2014>
- 6 Loftus, G. R., Bolles, R., Hunt, E., Loftus, E., Nelson, T., Nelson, W., ... Waggoner, W.  
7 (1985). Evaluating Forgetting Curves. *Journal of Experimental Psychology: Learning,*  
8 *Memory, and Cognition*, 11(2), 397–406. <http://doi.org/10.1037//0278-7393.11.2.397>
- 9 Luu, P., Sill, O. C., Gao, L., Becker, S., Wojtowicz, J. M., & Smith, D. M. (2012). The role  
10 of adult hippocampal neurogenesis in reducing interference. *Behavioral Neuroscience*,  
11 126(3), 381–91. <http://doi.org/10.1037/a0028252>
- 12 MacLeod, C., & Mathews, A. (1988). Anxiety and the allocation of attention to threat. *The*  
13 *Quarterly Journal of Experimental Psychology. A, Human Experimental Psychology*,  
14 40(4), 653–670. <http://doi.org/10.1080/14640748808402292>
- 15 Mayes, A. R. (1995). Memory and amnesia. *Behavioural Brain Research*, 66, 29–36.  
16 [http://doi.org/10.1016/0166-4328\(94\)00120-5](http://doi.org/10.1016/0166-4328(94)00120-5)
- 17 Mayes, A. R., & Roberts, N. (2001). Theories of episodic memory. *Philosophical*  
18 *Transactions of the Royal Society of London. Series B, Biological Sciences*, 356(1413),  
19 1395–408. <http://doi.org/10.1098/rstb.2001.0941>
- 20 McCullough, A. M., & Yonelinas, A. P. (2013). Cold-pressor stress after learning enhances  
21 familiarity-based recognition memory in men. *Neurobiology of Learning and Memory*,  
22 106, 11–17. <http://doi.org/10.1016/j.nlm.2013.06.011>

- 1 McGaugh, J. L. (2000). Neuroscience - Memory - a century of consolidation. *Science*,  
2 287(5451), 248–251. <http://doi.org/10.1126/science.287.5451.248>
- 3 McGaugh, J. L. (2002). Memory consolidation and the amygdala: a systems perspective.  
4 *Trends in Neurosciences*, 25(9), 456. Retrieved from  
5 <http://www.ncbi.nlm.nih.gov/pubmed/12183206>
- 6 Menning, S., de Ruiter, M. B., Veltman, D. J., Koppelmans, V., Kirschbaum, C., Boogerd,  
7 W., ... Schagen, S. B. (2015). Multimodal MRI and cognitive function in patients with  
8 breast cancer prior to adjuvant treatment — The role of fatigue. *NeuroImage: Clinical*,  
9 7, 547–554. <http://doi.org/10.1016/j.nicl.2015.02.005>
- 10 Menon, U., Gentry-Maharaj, A., Ryan, A., Sharma, A., Burnell, M., Hallett, R., ... Jacobs, I.  
11 (2008). Recruitment to multicentre trials--lessons from UKCTOCS: descriptive study.  
12 *BMJ (Clinical Research Ed.)*, 337, a2079. <http://doi.org/10.1136/bmj.a2079>
- 13 Miller, G.A., & Chapman, J. P. (2001). Misunderstanding analysis of covariance. *Journal of*  
14 *Abnormal Psychology*, 110(1), 40–48. <http://doi.org/10.1037/0021-843X.110.1.40>
- 15 Neisser, U., Boodoo, G., Bouchard, T. J., Boykin, A. W., Ceci, S. J., Loehlin, J. C., &  
16 Sternberg, R. J. (1996). Intelligence □: Knowns and Unknowns, 77–101.
- 17 Nunes, L. D., & Karpicke, J. D. (2015). Retrieval-based learning: Research at the interface  
18 between cognitive science and education. *Emerging Trends in the Social and Behavioral*  
19 *Sciences*, 1–16.
- 20 Pan, W., Stone, K. P., Hsuchou, H., Manda, V. K., Zhang, Y., & Kastin, A. J. (2011).  
21 Cytokine signaling modulates blood-brain barrier function. *Current Pharmaceutical*

- 1           *Design*, 17(33), 3729–40.
- 2   Pomykala, K. L., de Ruiter, M. B., Deprez, S., McDonald, B. C., & Silverman, D. H. S.  
3           (2013). Integrating imaging findings in evaluating the post-chemotherapy brain. *Brain*  
4           *Imaging and Behavior*, 7(4), 436–52. <http://doi.org/10.1007/s11682-013-9239-y>
- 5   Rabbitt, P., Lowe, C., & Shilling, V. (2001). Frontal tests and models for cognitive ageing.  
6           *European Journal of Cognitive Psychology*. <http://doi.org/10.1080/09541440125722>
- 7   Reese, H. (1997). Counterbalancing and other uses of repeated-measures Latin-square  
8           designs: Analyses and interpretations. *Journal of Experimental Child Psychology*, 158,  
9           137–158.
- 10   Richardson, A., Addington-Hall, J., Amir, Z., Foster, C., Stark, D., Armes, J., ... Sharpe, M.  
11           (2011). Knowledge, ignorance and priorities for research in key areas of cancer  
12           survivorship: findings from a scoping review. *British Journal of Cancer*, 105, 82–94.  
13           <http://doi.org/10.1038/bjc.2011.425>
- 14   Rubin, D. C., Wenzel, A. E., Anderson, J., Boneau, A., Cerella, J., Crovitz, H., ... Wixted, J.  
15           (1996). One Hundred Years of Forgetting□: A Quantitative Description of Retention,  
16           103(4), 734–760.
- 17   Ryan, T. J., Roy, D. S., Pignatelli, M., Arons, A., & Tonegawa, S. (2015). Engram cells  
18           retain memory under retrograde amnesia. *Science*, 348(6238), 1007–1013.  
19           <http://doi.org/10.1126/science.aaa5542>
- 20   Rzeski, W., Pruskil, S., Macke, A., Felderhoff-Mueser, U., Reiher, A. K., Hoerster, F., ...  
21           Ikonomidou, C. (2004). Anticancer agents are potent neurotoxins in vitro and in vivo.

- 1        *Annals of Neurology*, 56(3), 351–60. <http://doi.org/10.1002/ana.20185>
- 2        Sahay, A., Scobie, K. N., Hill, A. S., O’Carroll, C. M., Kheirbek, M. A., Burghardt, N. S., ...  
3        Hen, R. (2011). Increasing adult hippocampal neurogenesis is sufficient to improve  
4        pattern separation. *Nature*, 472(7344), 466–470. <http://doi.org/10.1038/nature09817>
- 5        Saykin, A. J., de Ruiter, M. B., McDonald, B. C., Deprez, S., & Silverman, D. H. S. (2013).  
6        Neuroimaging biomarkers and cognitive function in non-CNS cancer and its treatment:  
7        current status and recommendations for future research. *Brain Imaging and Behavior*,  
8        7(4), 363–73. <http://doi.org/10.1007/s11682-013-9283-7>
- 9        Seigers, R., & Fardell, J. E. (2011). Neurobiological basis of chemotherapy-induced cognitive  
10        impairment: a review of rodent research. *Neuroscience and Biobehavioral Reviews*,  
11        35(3), 729–41. <http://doi.org/10.1016/j.neubiorev.2010.09.006>
- 12        Shapiro, S. S., Wilk, M. B., & Chen, H. J. (1968). A Comparative Study of Various Tests for  
13        Normality. *J Am Stat Assoc*, 63, 1343–1372. <http://doi.org/10.2307/2285889>
- 14        Shilling, V., Jenkins, V., Fallowfield, L., & Howell, T. (2003). The effects of hormone  
15        therapy on cognition in breast cancer. *The Journal of Steroid Biochemistry and*  
16        *Molecular Biology*, 86(3–5), 405–412. <http://doi.org/10.1016/j.jsbmb.2003.07.001>
- 17        Snodgrass, J. G., & Vanderwart, M. (1980). A standardized set of 260 pictures: norms for  
18        name agreement, image agreement, familiarity, and visual complexity. *Journal of*  
19        *Experimental Psychology. Human Learning and Memory*, 6(2), 174–215. Retrieved  
20        from <http://www.ncbi.nlm.nih.gov/pubmed/7373248>
- 21        Stark, D., Kiely, M., Smith, A., Velikova, G., House, A., & Selby, P. (2002). Anxiety



- 1 disorders in cancer patients: Their nature, associations, and relation to quality of life.  
2 *Journal of Clinical Oncology*, 20(14), 3137–3148.  
3 <http://doi.org/10.1200/JCO.2002.08.549>
- 4 Terrando, N., Monaco, C., Ma, D., Foxwell, B. M. J., Feldmann, M., & Maze, M. (2010).  
5 Tumor necrosis factor-alpha triggers a cytokine cascade yielding postoperative cognitive  
6 decline. *Proceedings of the National Academy of Sciences of the United States of*  
7 *America*, 107(47), 20518–22. <http://doi.org/10.1073/pnas.1014557107>
- 8 Tonegawa, S., Pignatelli, M., Roy, D. S., & Ryan, T. J. (2015). Memory engram storage and  
9 retrieval. *Current Opinion in Neurobiology*. <http://doi.org/10.1016/j.conb.2015.07.009>
- 10 Traeger, L., Greer, J. A., Fernandez-Robles, C., Temel, J. S., & Pirl, W. F. (2012). Evidence-  
11 based treatment of anxiety in patients with cancer. *Journal of Clinical Oncology*.  
12 <http://doi.org/10.1200/JCO.2011.39.5632>
- 13 Vardy, J., Wefel, J. S., Ahles, T., Tannock, I. F., & Schagen, S. B. (2008). Cancer and  
14 cancer-therapy related cognitive dysfunction: an international perspective from the  
15 Venice cognitive workshop. *Annals of Oncology*: Official Journal of the European  
16 Society for Medical Oncology / ESMO, 19(4), 623–9.  
17 <http://doi.org/10.1093/annonc/mdm500>
- 18 Wefel, J. S., Vardy, J., Ahles, T., & Schagen, S. B. (2011). International Cognition and  
19 Cancer Task Force recommendations to harmonise studies of cognitive function in  
20 patients with cancer. *The Lancet. Oncology*, 12(7), 703–8. [http://doi.org/10.1016/S1470-](http://doi.org/10.1016/S1470-2045(10)70294-1)  
21 [2045\(10\)70294-1](http://doi.org/10.1016/S1470-2045(10)70294-1)
- 22 Wixted, J. T. (1990). Analyzing the empirical course of forgetting. *Journal of Experimental*

1        *Psychology: Learning, Memory, and Cognition*, 16(5), 927–935.

2        <http://doi.org/10.1037/0278-7393.16.5.927>

3        Wixted, J. T. (2004). The psychology and neuroscience of forgetting. *Annual Review of*

4        *Psychology*, 55, 235–69. <http://doi.org/10.1146/annurev.psych.55.090902.141555>

5        Zhang, C. L., Zou, Y., He, W., Gage, F. H., & Evans, R. M. (2008). A role for adult TLX-

6        positive neural stem cells in learning and behaviour. *Nature*, 451(7181), 1004–1007.

7        <http://doi.org/10.1038/nature06562>

8

9

1 **Table 1: Sample Characteristics**

| Patients |                        | Controls            |        |       |           |      |       |           |
|----------|------------------------|---------------------|--------|-------|-----------|------|-------|-----------|
| ID       | Diagnosis              | Treatment(Cycles)   | Age    | Sex   | Education | Age  | Sex   | Education |
| 1        | Ewing sarcoma*         | VIDE (6)<br>VAI (8) | 20     | M     | College   | 24   | M     | Degree    |
| 2        | Osteosarcoma           | MAP (4)             | 20     | F     | College   | 19   | F     | College   |
| 3        | Germ cell tumour       | BEP (3)             | 30     | M     | Degree    | 30   | M     | Degree    |
| 4        | Osteosarcoma           | MAP (6)             | 17     | M     | College   | 20   | M     | Degree    |
| 5        | Hodgkin lymphoma       | ABVD (2)<br>AVD (4) | 19     | F     | College   | 20   | F     | College   |
| 6        | Ewing sarcoma*         | VIDE (6)<br>VAI (8) | 17     | F     | College   | 21   | F     | College   |
| 7        | Breast cancer          | FEC-T (6)           | 46     | F     | Degree    | 46   | F     | College   |
| 8        | Breast cancer          | FEC-T (6)           | 45     | F     | Degree    | 46   | F     | Degree    |
| 9        | Breast cancer          | FEC-T (6)           | 45     | F     | Degree    | 46   | F     | Degree    |
| 10       | Hodgkin lymphoma       | ABVD (6)            | 22     | F     | Degree    | 20   | F     | College   |
| M        | 30% Breast cancer      |                     | 28.1   | 70% F | 50%       | 29.2 | 70% F | 50%       |
| (S       | 40% Sarcoma            |                     | (12.44 | 30% M | College   | 0    | 30%   | College   |
| D)       | 20% Hodgkin's lymphoma |                     | )      |       | 50%       | (12. | M     | 50%       |
| %        | 10% Germ cell tumour   |                     |        |       | Degree    | 01)  |       | Degree    |

2 *Note.* Abbreviations: VIDE=vincristine, ifosfamide, doxorubicin, etoposide; VAI =  
3 vincristine, ifosfamide, actinomycin, doxorubicin; MAP= high dose methotrexate, cisplatin,  
4 doxorubicin, BEP=bleomycin, etoposide, cisplatin; FEC-T= fluorouracil, epirubicin,  
5 cyclophosphamide, docetaxel; ABVD=doxorubicin, bleomycin, vinblastine, dacarbazine;  
6 \*Ewing sarcoma patients received VAI as part of neoadjuvant treatment, hence were  
7 evaluated pre-surgery. The remainder were due for adjuvant treatment and were evaluated  
8 post-surgery; M=mean, SD=standard deviation.

9

1                   **Figure captions.**

2                   *Figure 1. Flowchart of patients included in study and analyses.*

3                   *Figure 2. Memory task procedure.* Each Session corresponds to a day of testing, on  
4 three consecutive days of testing. In patients, Sessions 1 and 2 take place before treatment  
5 and Session 3 after treatment. L: On-screen presentation (2.5 seconds) of each word in Lists  
6 1, 2, 3 (participants had to include each word in a verbalised sentence). FR11, 12, 13, 14:  
7 three immediate and a delayed oral Free Recall Test of List 1. FR21, 22, 23, 24: three  
8 immediate Free Recall Tests and a delayed free recall Test of List 2. FR31, 32, 33, 34: three  
9 immediate Free Recall Tests of List 3. In all Sessions the third free recall takes place after a  
10 2-minute distracter task. CR15, CR25: Cued recall tests of Lists 1 and 2. Forgetting rate 1 and  
11 2: proportion of information forgotten between 2-minute and 24-hour delayed FR tests before  
12 (FR13 and FR14) and after (FR23 and FR24) treatment. Encoding 1 and 2: learning  
13 performance between the two immediate FR tests before (FR21 and FR22) and after (FR31  
14 and FR32) treatment. Delayed Retrieval 1 and 2: proportion of information recalled between  
15 the 24-hour delayed free and cued recall tests before (FR14 and CR15) and after treatment  
16 (FR24 and FR25).

17                   *Figure 3. Forgetting rates in patients and controls before and after treatment. A.*  
18 Error bars represent the standard deviation. B. Scatter plot depicting the percentage of words  
19 forgotten by controls and patients (light/dark grey) on Session 3 (after treatment). Each data  
20 point represents the individual forgetting rate of a participant.\*p<.05, \*\*p<.01.

1            **Figure 4. Learning rates in patients and controls before and after treatment.**

2    Total learning performance is the average percentage of words learnt over two immediate  
3    free recall tests. Error bars represent the standard deviation. \* $p < .05$ , \*\* $p < .01$ .

4            **Figure 5. Retrieval performance in patients and controls before and after**

5    **treatment.** A. Differences between delayed free and cued recall. B. Differences in the  
6    average number of intrusions over all recall trials, between patients and controls, before and  
7    after treatment. Error bars represent the standard deviation.

8

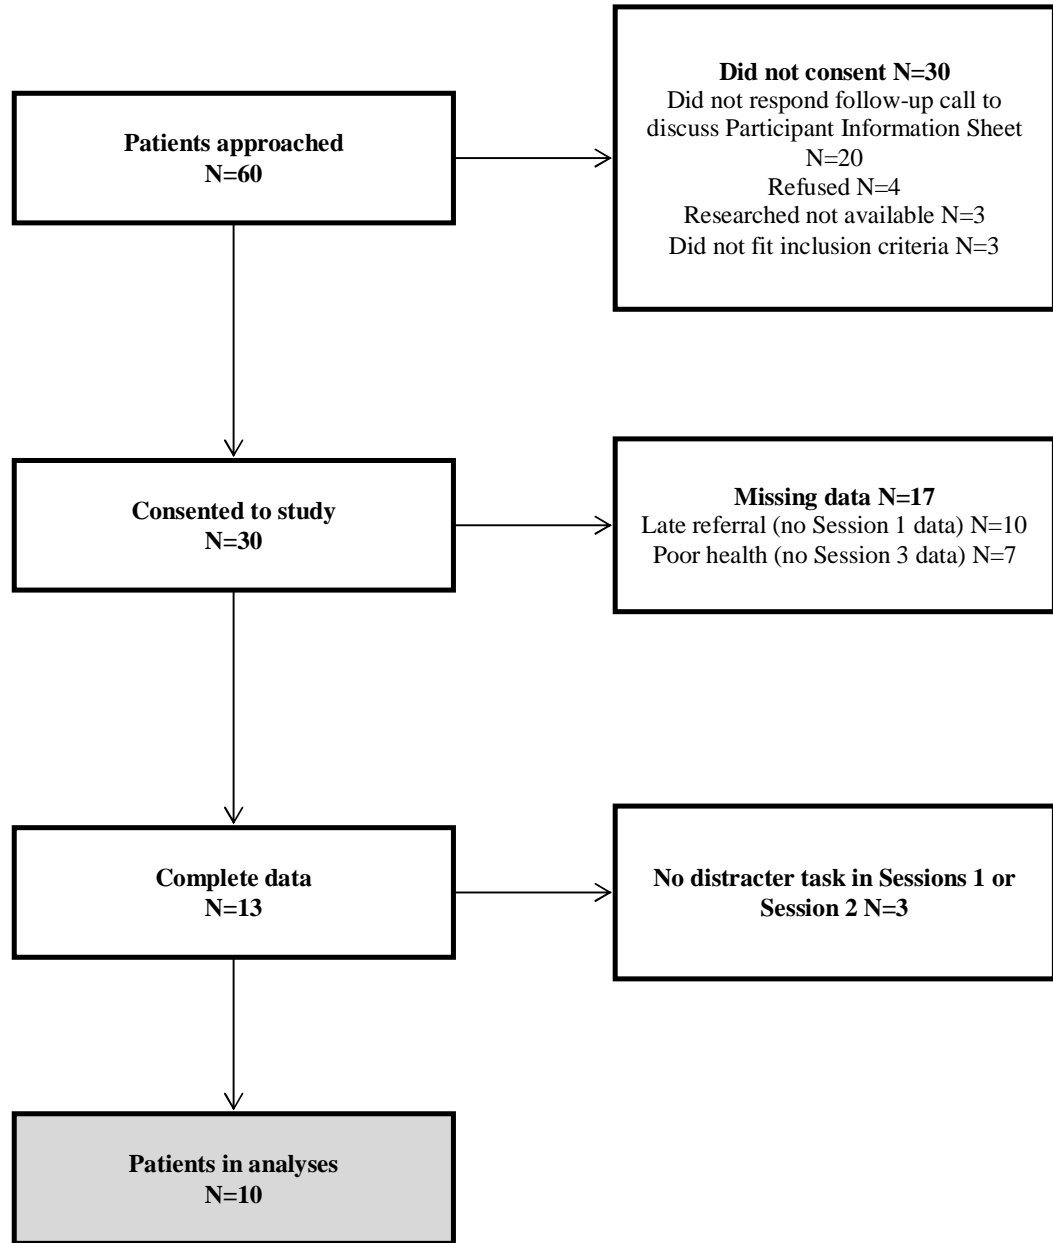

1

2

*Figure 1. Flowchart of patients included in study and analyses.*

3

4

5

1

2

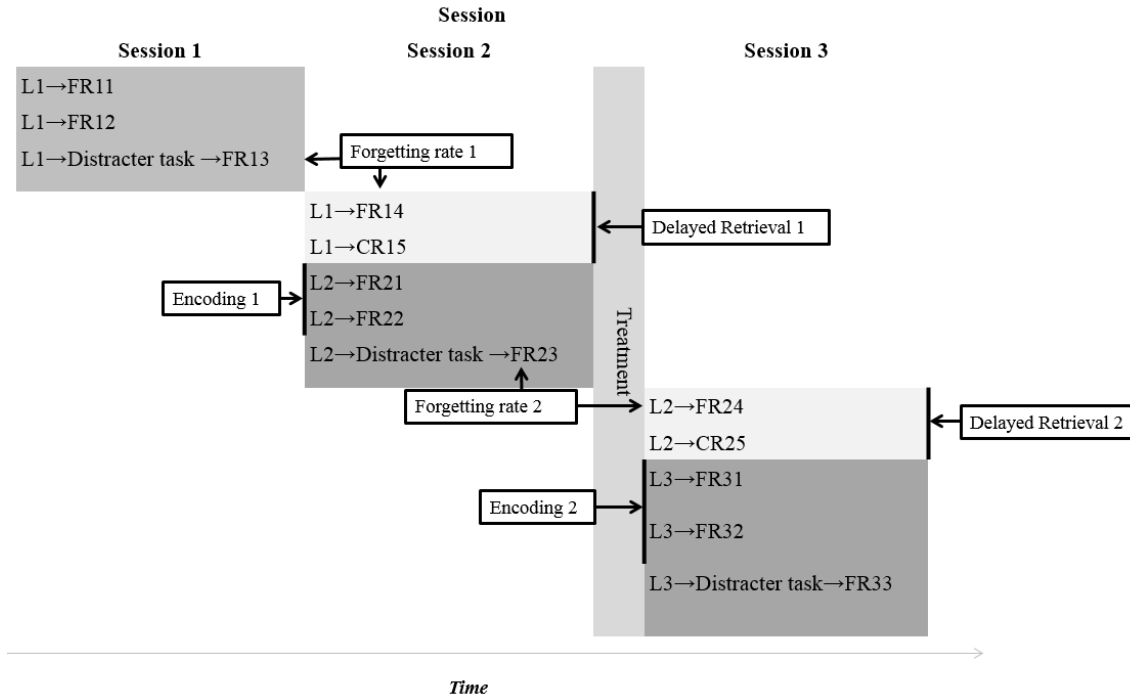

3

*Figure 2. Memory task procedure.* Each Session corresponds to a day of testing, on

4

three consecutive days of testing. In patients, Sessions 1 and 2 take place before treatment

5

and Session 3 after treatment. L: On-screen presentation (2.5 seconds) of each word in Lists

6

1, 2, 3 (participants had to include each word in a verbalised sentence). FR11, 12, 13, 14:

7

three immediate and a delayed oral Free Recall Test of List 1. FR21, 22, 23, 24: three

8

immediate Free Recall Tests and a delayed free recall Test of List 2. FR31, 32, 33, 34: three

9

immediate Free Recall Tests of List 3. In all Sessions the third free recall takes place after a

10

2-minute distracter task. CR15, CR25: Cued recall tests of Lists 1 and 2. Forgetting rate 1 and

11

2: proportion of information forgotten between 2-minute and 24-hour delayed FR tests before

12

(FR13 and FR14) and after (FR23 and FR24) treatment. Encoding 1 and 2: learning

13

performance between the two immediate FR tests before (FR21 and FR22) and after (FR31

1 and FR32) treatment. Delayed Retrieval 1 and 2: proportion of information recalled between  
2 the 24-hour delayed free and cued recall tests before (FR14 and CR15) and after treatment  
3 (FR24 and FR25).

4

5

6

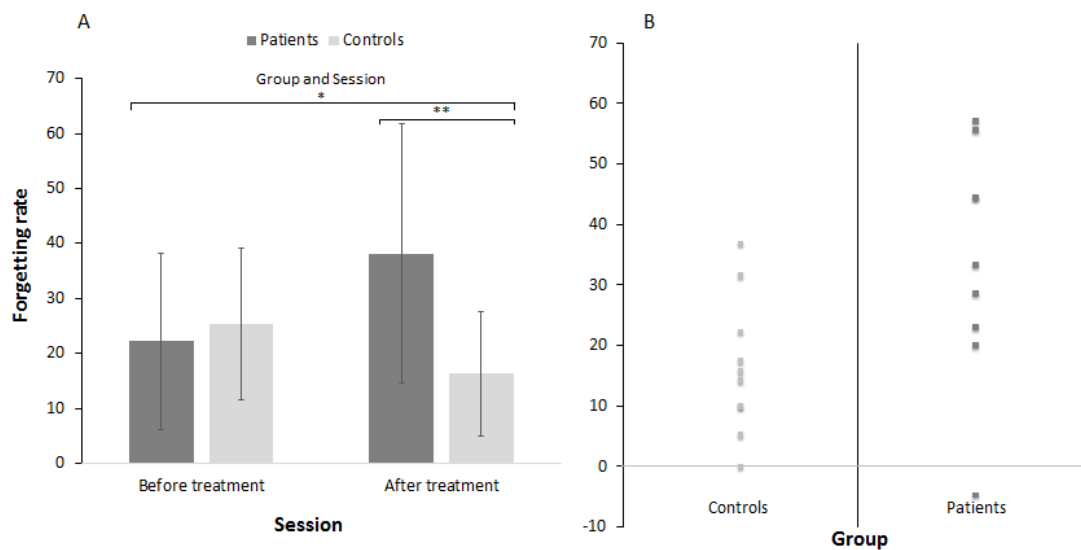

7

8 **Figure 3. Forgetting rates in patients and controls before and after treatment. A.**

9 Error bars represent the standard deviation. B. Scatter plot depicting the percentage of words

10 forgotten by controls and patients (light/dark grey) on Session 3 (after treatment). Each data

11 point represents the individual forgetting rate of a participant.\*p<.05, \*\*p<.01.

12

13

14



1

2

3

4

5

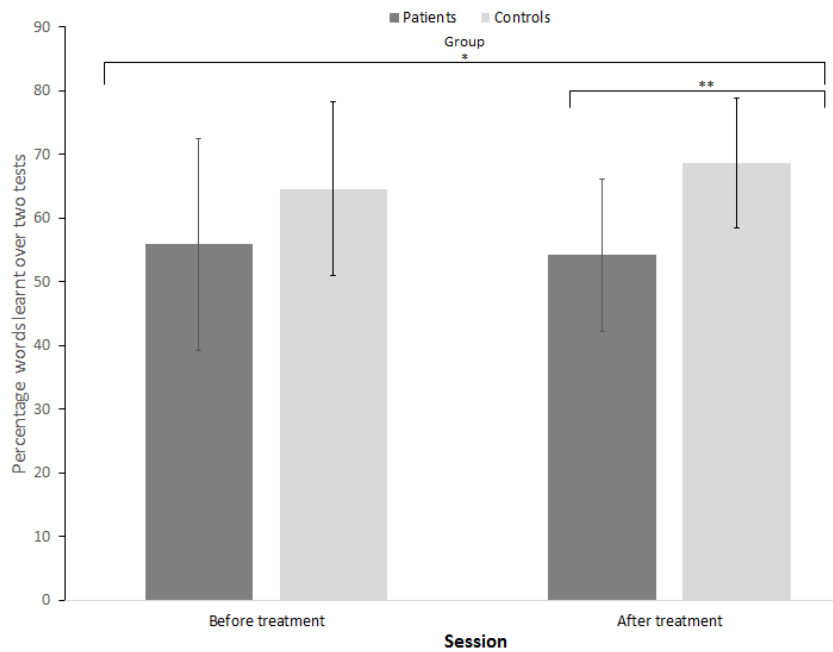

6

7 **Figure 4. Learning rates in patients and controls before and after treatment.**

8 Total learning performance is the average percentage of words learnt over two immediate

9 free recall tests. Error bars represent the standard deviation. \* $p < .05$ , \*\* $p < .01$ .

10

1

2

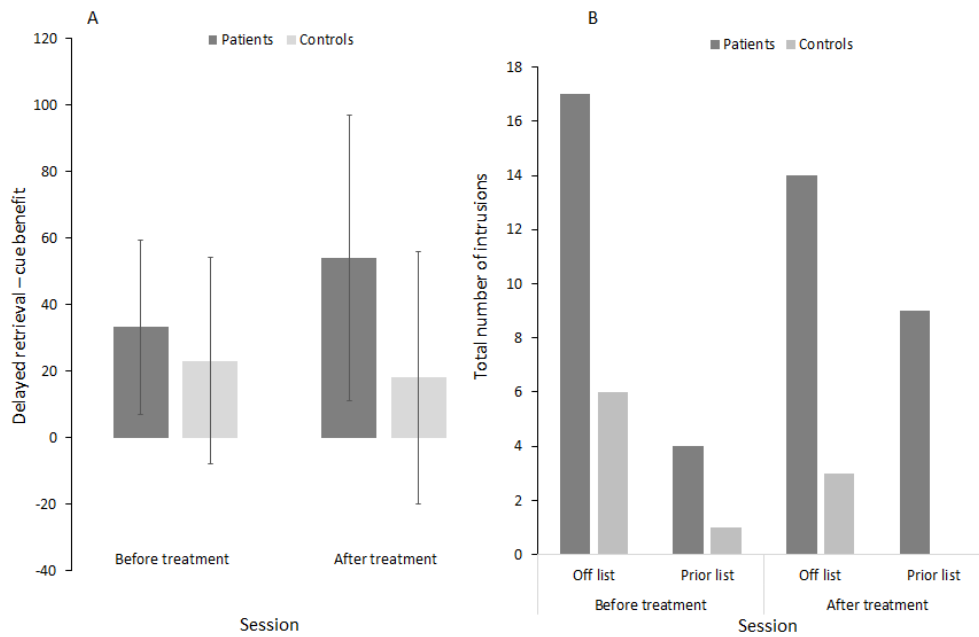

3

4 **Figure 5. Retrieval performance in patients and controls before and after**  
5 **treatment.** A. Differences between delayed free and cued recall. B. Differences in the  
6 average number of intrusions over all recall trials, between patients and controls, before and  
7 after treatment. Error bars represent the standard deviation.

8

9

1 **Supplementary material**

2

3 **Tables S1-S4.**

4 **Figure S1.**

5 **Appendix.**

6

7 **Table S1.**Demographic characteristics of included and excluded patients.

|     | Included patients<br>N, %/M (SD) | Excluded patients<br>N, M (SD) | P   |
|-----|----------------------------------|--------------------------------|-----|
| Age | 10, 28.1 (12.44)                 | 20, 34.1 (13.6)                | .25 |
| Sex | 10, 70% Female                   | 20, 75% female                 | NA  |

8

9

10 **Table S2.** Neuropsychological performance and patient-reported psychological status in

11 patients and controls.

| <b>Function/Test</b> | <b>Score</b> | <b>Patients in study</b><br><b>M (SD)</b> | <b>Controls</b><br><b>M (SD)</b> | <b>Patients</b><br><b>excluded</b><br><b>M (SD)</b> |
|----------------------|--------------|-------------------------------------------|----------------------------------|-----------------------------------------------------|
|                      |              |                                           |                                  |                                                     |

|                                                                             |                                |               |                    |                  |
|-----------------------------------------------------------------------------|--------------------------------|---------------|--------------------|------------------|
|                                                                             |                                |               |                    |                  |
| <b>Neuropsychological battery.</b>                                          |                                |               |                    |                  |
| <b>(Patients N=8; Controls N=7, except WTAR where both groups are N=10)</b> |                                |               |                    |                  |
| <b>Pre-morbid intellectual functioning (WTAR)</b>                           | FSIQ                           | 100.5 (6.26)  | 108.5**<br>(5.48)  | 101.1<br>(10.29) |
| <b>Attention (D2 Concentration-Endurance)</b>                               | Items processed without errors | 402.4 (60.69) | 491.43*<br>(53.18) | 437.7<br>(62.78) |
| <b>Executive function (Stroop, Verbal fluency, and DKEFS-TMT)</b>           | Stroop Interference            | 57.3 (13.79)  | 52.57 (3.41)       | 54.7 (8.04)      |
|                                                                             | Verbal fluency                 | 12.09 (2.98)  | 14.38 (2.52)       | 11.94 (3.04)     |
|                                                                             | Category fluency               | 21.28 (7.4)   | 20.71 (4.38)       | 21.93 (3.12)     |
|                                                                             | DKEFS Total                    | 11.11 (1.95)  | 9.43 (3.42)        | 11.92 (9.01)     |
| <b>Immediate memory (BMIPB)</b>                                             | Story memory immediate         | 27.8 (9.31)   | 27.43 (6.90)       | 27.56 (9.01)     |
|                                                                             | Figure memory immediate        | 80.36 (17.26) | 91.8 (9.26)        | 73.16<br>(10.46) |
| <b>Delayed memory</b>                                                       | Story memory delayed           | 25.3 (7.54)   | 25.28 (8.36)       | 24.5 (8.98)      |

|                                                        |                                                       |               |                  |                   |
|--------------------------------------------------------|-------------------------------------------------------|---------------|------------------|-------------------|
| <b>(BMIPB)</b>                                         | Figure memory<br>delayed                              | 73.79 (14.05) | 84.73<br>(13.29) | 70.3 (11.35)      |
| <b>Verbal recognition<br/>memory<br/>(BMIPB)</b>       | Item recognition                                      | 28.4 (1.9)    | 28.71 (1.11)     | 27.5 (2.16)       |
|                                                        | List recognition<br>(Temporal order)                  | 27.42 (3.1)   | 29.14 (1.46)     | 29.00 (.96)       |
| <b>Visual recognition<br/>memory<br/>(BMIPB)</b>       | Design recognition                                    | 37.71 (2.75)  | 39.43 (1.13)     | 39.6 (.60)*       |
|                                                        | Design<br>identification<br>(Temporal order)          | 9.14 (.89)    | 9.85 (.37)*      | 9.62 (.81)        |
| <b>Speed of information<br/>processing<br/>(BMIPB)</b> | Information<br>processing adjusted<br>for motor speed | 71.86 (21.15) | 72.84<br>(10.86) | 76.21<br>(17.03)  |
| <b>Working memory<br/>(WAIS-III Digit span)</b>        | Digit span Total                                      | 15.28 (2.75)  | 19.57*<br>(3.78) | 15.86 (3.38)      |
| <b>Patient-reported psychological status</b>           |                                                       |               |                  |                   |
| <b>(Patients N=6; Controls N=9)</b>                    |                                                       |               |                  |                   |
|                                                        | Fatigue                                               | 15.83 (1.72)  | 13.71 (1.25)     | 9, 16.5<br>(2.83) |
|                                                        | Anxiety                                               | 7.66 (2.33)   | 7.14 (2.34)      | 9, 7.22<br>(2.28) |

|  |            |             |             |                   |
|--|------------|-------------|-------------|-------------------|
|  | Depression | 3.66 (2.25) | 3.42 (3.31) | 9, 3.78<br>(3.15) |
|--|------------|-------------|-------------|-------------------|

1

2 *Note.* A subset of the 10 patients included in our final sample have completed the  
3 neuropsychological battery and returned the psychological status questionnaires. The table  
4 depicts their average performance and compares them to patients we excluded (N=18) who  
5 completed the neuropsychological and psychological status measures. The tests included: the  
6 Wechsler Test of Adult Reading (WTAR, (Strauss, Sherman, & Spreen, 2006), D2 Test of  
7 Attention (Bates & Lemay, 2004), Stroop test (Golden, 1975), Test of Memory Malinger  
8 (Rees, Tombaugh, Gansler, & Moczynski, 1998), the Birt Memory and Information  
9 Processing Battery (BMIPB, Coughlan, Oddy, Crawford, 2007), Digit span from the  
10 Wechsler Adult Intelligence Scale – III (WAIS), Verbal fluency, and Trail Making Test of  
11 the Delis-Kaplan Executive Function System (DKEFS-TMT, (Strauss et al., 2006). The self-  
12 report measures included the EORTC Quality of Life Questionnaire (Aaronson et al., 1993),  
13 Chalder Fatigue Scale (Dittner, Wessely, & Brown, 2004), Cognitive Failures Questionnaire  
14 (Broadbent, Cooper, FitzGerald, & Parkes, 1982), and Hospital Anxiety and Depression  
15 Scale (Zigmond & Snaith, 1983). Mean difference following Bonferroni corrections for  
16 multiple comparisons \*\* $p < .01$ , \* $p < .05$ . Available results suggest minimal differences  
17 between patients and controls on memory tests, no differences between patients included in  
18 the analyses and those excluded, and low level of emotional distress. Excluded and included  
19 patients were largely similar, with the exception of one difference on the Design recognition  
20 test. Compared to controls, patients scored lower on Digit Span, Design identification test of  
21 the BMIPB, and total attention without errors score of the D2.

1

2

1 **Table S3.** Characteristics of words used in memory task.

| <b>List</b>                       | <b>Word</b>       | <b>Familiarity</b> | <b>Kucera-Francis<br/>Frequency</b> | <b>Summary</b>                                                               |
|-----------------------------------|-------------------|--------------------|-------------------------------------|------------------------------------------------------------------------------|
| <b>Animals &amp;<br/>Vehicles</b> | <b>Camel</b>      | 421                | 1                                   | Familiarity<br>M= 340.95<br>SD=231.02<br><br>Frequency<br>M=20.21<br>SD=35.6 |
|                                   | <b>Helicopter</b> | 0                  | 1                                   |                                                                              |
|                                   | <b>Motorcycle</b> | 0                  | 0                                   |                                                                              |
|                                   | <b>Elephant</b>   | 459                | 7                                   |                                                                              |
|                                   | <b>Bicycle</b>    | 0                  | 5                                   |                                                                              |
|                                   | <b>Butterfly</b>  | 481                | 2                                   |                                                                              |
|                                   | <b>Donkey</b>     | 0                  | 1                                   |                                                                              |
|                                   | <b>Lion</b>       | 511                | 17                                  |                                                                              |
|                                   | <b>Train</b>      | 548                | 82                                  |                                                                              |
|                                   | <b>Plane</b>      | 558                | 114                                 |                                                                              |
|                                   | <b>Snail</b>      | 489                | 1                                   |                                                                              |
|                                   | <b>Rabbit</b>     | 523                | 11                                  |                                                                              |
|                                   | <b>Sheep</b>      | 507                | 23                                  |                                                                              |
|                                   | <b>Bear</b>       | 526                | 57                                  |                                                                              |
|                                   | <b>Ostrich</b>    | 358                | 0                                   |                                                                              |
|                                   | <b>Horse</b>      | 560                | 117                                 |                                                                              |
|                                   | <b>Sledge</b>     | 0                  | 0                                   |                                                                              |
|                                   | <b>Squirrel</b>   | 511                | 1                                   |                                                                              |
| <b>Giraffe</b>                    | 381               | 0                  |                                     |                                                                              |
| <b>Swan</b>                       | 0                 | 3                  |                                     |                                                                              |



|                             |                   |     |    |             |
|-----------------------------|-------------------|-----|----|-------------|
|                             | <b>Fish</b>       | 548 | 35 |             |
|                             | <b>Kangaroo</b>   | 0   | 0  |             |
|                             | <b>Goat</b>       | 469 | 6  |             |
|                             | <b>Zebra</b>      | 333 | 1  |             |
| <b>Fruits &amp; Clothes</b> | <b>Dress</b>      | 588 | 67 |             |
|                             | <b>Watermelon</b> | 0   | 0  |             |
|                             | <b>Mitten</b>     | 0   | 0  |             |
|                             | <b>Jumper</b>     | 0   | 1  |             |
|                             | <b>Strawberry</b> | 539 | 0  |             |
|                             | <b>Pear</b>       | 567 | 6  |             |
|                             | <b>Apple</b>      | 598 | 9  | Familiarity |
|                             | <b>Trousers</b>   | 0   | 7  | M=439.79    |
|                             | <b>Pineapple</b>  | 489 | 9  | SD=232.00   |
|                             | <b>Orange</b>     | 567 | 23 | Frequency   |
|                             | <b>Lemon</b>      | 518 | 18 | M=12.58     |
|                             | <b>Grapes</b>     | 0   | 0  | SD=15.99    |
|                             | <b>Cherry</b>     | 514 | 6  |             |
|                             | <b>Glove</b>      | 575 | 9  |             |
|                             | <b>Necklace</b>   | 536 | 3  |             |
|                             | <b>Banana</b>     | 576 | 4  |             |
|                             | <b>Shoe</b>       | 569 | 14 |             |
|                             | <b>Ring</b>       | 589 | 47 |             |

|                      |                  |     |     |             |
|----------------------|------------------|-----|-----|-------------|
|                      | <b>Belt</b>      | 550 | 29  |             |
|                      | <b>Boot</b>      | 566 | 13  |             |
|                      | <b>Skirt</b>     | 551 | 21  |             |
|                      | <b>Sock</b>      | 578 | 4   |             |
|                      | <b>Umbrella</b>  | 511 | 8   |             |
|                      | <b>Tomato</b>    | 574 | 4   |             |
| <b>Vegetables</b>    | <b>Asparagus</b> | 534 | 1   |             |
| <b>&amp; Kitchen</b> | <b>Carrot</b>    | 539 | 1   |             |
| <b>objects</b>       | <b>Spoon</b>     | 612 | 6   |             |
|                      | <b>Fridge</b>    | 0   | 0   |             |
|                      | <b>Corn</b>      | 548 | 34  |             |
|                      | <b>Glass</b>     | 611 | 99  |             |
|                      | <b>Table</b>     | 599 | 198 |             |
|                      | <b>Iron</b>      | 555 | 43  |             |
|                      | <b>Scissors</b>  | 559 | 1   | Familiarity |
|                      | <b>Toaster</b>   | 520 | 0   | M=493.83    |
|                      | <b>Chair</b>     | 617 | 66  | SD=193.01   |
|                      | <b>Oven</b>      | 577 | 7   | Frequency   |
|                      | <b>Mushroom</b>  | 0   | 2   | M=28.63     |
|                      | <b>Onion</b>     | 550 | 15  | SD=46.34    |
|                      | <b>Pepper</b>    | 554 | 13  |             |
|                      | <b>Potato</b>    | 612 | 15  |             |
|                      | <b>Kettle</b>    | 551 | 3   |             |

|                                                                         |                   |     |    |                                                                            |
|-------------------------------------------------------------------------|-------------------|-----|----|----------------------------------------------------------------------------|
|                                                                         | <b>Knife</b>      | 573 | 76 |                                                                            |
|                                                                         | <b>Ladder</b>     | 507 | 19 |                                                                            |
|                                                                         | <b>Bottle</b>     | 591 | 76 |                                                                            |
|                                                                         | <b>Pumpkin</b>    | 0   | 2  |                                                                            |
|                                                                         | <b>Broom</b>      | 547 | 2  |                                                                            |
|                                                                         | <b>Stool</b>      | 531 | 8  |                                                                            |
|                                                                         | <b>Lettuce</b>    | 565 | 0  |                                                                            |
| <b>Four-<br/>legged<br/>animals<br/>and<br/>Musical<br/>instruments</b> | <b>Alligator</b>  | 442 | 4  | Familiarity<br>M=426.83<br>SD=170.33<br><br>Frequency<br>M=8.33<br>SD=9.95 |
|                                                                         | <b>Deer</b>       | 509 | 13 |                                                                            |
|                                                                         | <b>Frog</b>       | 507 | 1  |                                                                            |
|                                                                         | <b>Horn</b>       | 498 | 31 |                                                                            |
|                                                                         | <b>Leopard</b>    | 431 | 0  |                                                                            |
|                                                                         | <b>Violin</b>     | 468 | 11 |                                                                            |
|                                                                         | <b>Monkey</b>     | 531 | 9  |                                                                            |
|                                                                         | <b>Accordion</b>  | 394 | 1  |                                                                            |
|                                                                         | <b>Turtle</b>     | 509 | 8  |                                                                            |
|                                                                         | <b>Racoon</b>     | 0   | 0  |                                                                            |
|                                                                         | <b>Trumpet</b>    | 490 | 7  |                                                                            |
|                                                                         | <b>Bull</b>       | 0   | 14 |                                                                            |
|                                                                         | <b>Ferret</b>     | 0   | 1  |                                                                            |
|                                                                         | <b>Guitar</b>     | 550 | 19 |                                                                            |
|                                                                         | <b>Rhinoceros</b> | 400 | 3  |                                                                            |
| <b>Flute</b>                                                            | 496               | 1   |    |                                                                            |

|                       |                 |     |     |             |
|-----------------------|-----------------|-----|-----|-------------|
|                       | <b>Gorilla</b>  | 554 | 0   |             |
|                       | <b>Seal</b>     | 482 | 17  |             |
|                       | <b>Harp</b>     | 430 | 1   |             |
|                       | <b>Piano</b>    | 545 | 38  |             |
|                       | <b>Tiger</b>    | 513 | 7   |             |
|                       | <b>Beaver</b>   | 470 | 3   |             |
|                       | <b>Skunk</b>    | 519 | 0   |             |
|                       | <b>Drum</b>     | 506 | 11  |             |
| <b>Birds and Toys</b> | <b>Chicken</b>  | 544 | 37  |             |
|                       | <b>Sailboat</b> | 0   | 0   |             |
|                       | <b>House</b>    | 600 | 591 |             |
|                       | <b>Penguin</b>  | 360 | 0   |             |
|                       | <b>Rooster</b>  | 385 | 3   | Familiarity |
|                       | <b>Swing</b>    | 0   | 24  | M=411.66    |
|                       | <b>Sparrow</b>  | 523 | 0   | SD=198.12   |
|                       | <b>Parrot</b>   | 0   | 1   |             |
|                       | <b>Crow</b>     | 490 | 2   | Frequency   |
|                       | <b>Wagon</b>    | 443 | 55  | M=35.54     |
|                       | <b>Football</b> | 565 | 36  | SD=119.56   |
|                       | <b>Eagle</b>    | 465 | 5   |             |
|                       | <b>Skate</b>    | 534 | 1   |             |
|                       | <b>Duck</b>     | 529 | 9   |             |
|                       | <b>Dove</b>     | 415 | 4   |             |

|  |                |     |    |
|--|----------------|-----|----|
|  | <b>Whistle</b> | 505 | 4  |
|  | <b>Balloon</b> | 520 | 10 |
|  | <b>Cannon</b>  | 498 | 7  |
|  | <b>Clown</b>   | 511 | 3  |
|  | <b>Stork</b>   | 393 | 0  |
|  | <b>Kite</b>    | 481 | 1  |
|  | <b>Truck</b>   | 620 | 57 |
|  | <b>Pigeon</b>  | 499 | 3  |
|  | <b>Snowman</b> | 0   | 0  |

1 *Note.* The unequal distribution of the words in the lists was determined by the number of  
2 concepts in the database, which complied with our length, familiarity, and frequency  
3 constraints. There were no significant differences between the familiarity and frequency of  
4 words in different lists, List Familiarity  $F_{4,115}=1.71$  ( $p=.15$ ); List Frequency  $F_{4,115}=.83$  ( $p=.51$ )  
5

6 **Table S4.** Percentage recall on immediate and delayed free recall (FR) and delayed cued  
7 recall (CR) tests in each Session and Group before controlling for FSIQ.

| <b>Session</b>   | <b>Group</b> | <b>FR</b>        | <b>FR</b>        | <b>FR</b>        | <b>FR</b>                 | <b>CR</b>                 |
|------------------|--------------|------------------|------------------|------------------|---------------------------|---------------------------|
|                  |              | <b>M (SD)</b>    | <b>M (SD)</b>    | <b>M (SD)</b>    | <b>Delayed<br/>M (SD)</b> | <b>Delayed<br/>M (SD)</b> |
| <b>Session 1</b> | Patient      | 46.66<br>(13.58) | 61.66<br>(18.08) | 66.24<br>(14.08) | 52.07<br>(18.34)          | 67.08<br>(18.05)          |
|                  | Control      | 61.59            | 77.49 (9.25)     | 87.07 (9.90)     | 64.57                     | 76.66                     |

|                  |         |                  |                  |                  |                  |                  |
|------------------|---------|------------------|------------------|------------------|------------------|------------------|
|                  |         | (12.97)          |                  |                  | (11.82)          | (11.32)          |
| <b>Session 2</b> | Patient | 47.49<br>(18.65) | 64.16<br>(14.72) | 68.33<br>(18.13) | 42.91<br>(21.16) | 62.08<br>(26.38) |
|                  | Control | 57.49<br>(13.29) | 71.66<br>(13.99) | 79.99<br>(15.69) | 67.08<br>(17.72) | 74.99<br>(15.08) |
| <b>Session 3</b> | Patient | 48.33<br>(10.05) | 60 (13.91)       | 61.66<br>(16.53) |                  |                  |
|                  | Control | 59.74<br>(11.62) | 77.49 (8.82)     | 87.07<br>(11.52) |                  |                  |

1 Abbreviations: M=mean; SD=standard deviation

2

3

4

5

- 1 **Figure S1.** A comparison of forgetting, learning and retrieval scores of the 10 patients
- 2 included in the manuscript (Top) and an extended sample of 13 patients, including 3 who
- 3 were tested without a computer in Session 3 (Bottom). The error bars represent standard
- 4 error.

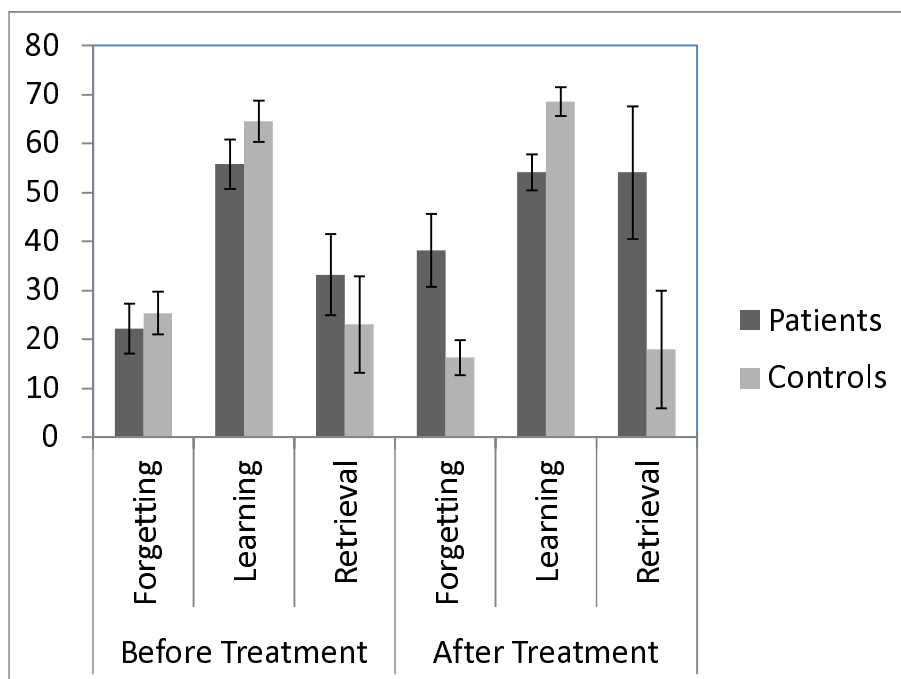

5

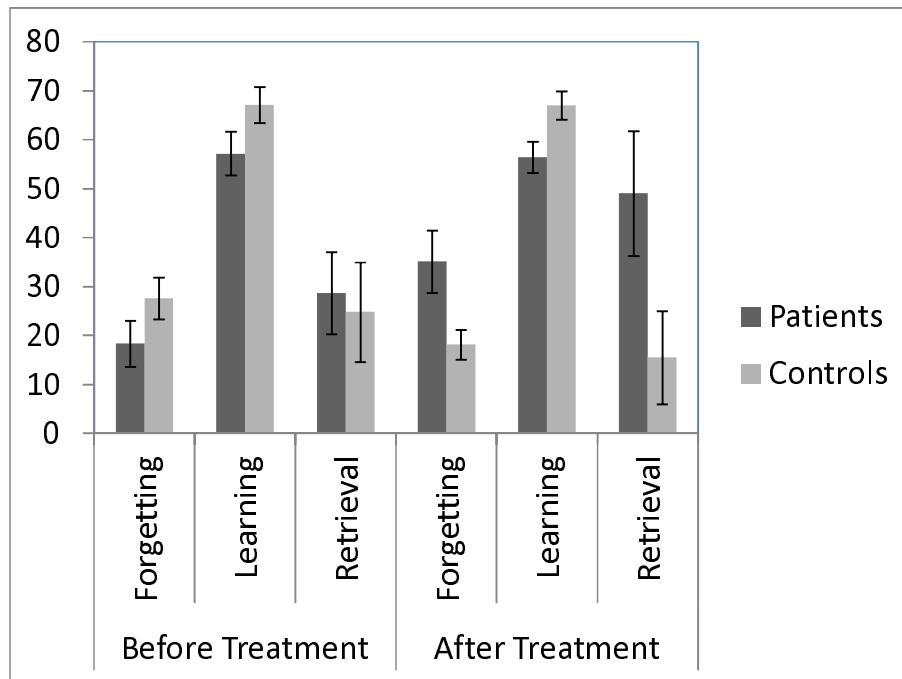

1



1 **Appendix: Memory task instructions**

2 **Session 1:** Participants were given the following instructions before they studied the first list  
3 of words (List 1):

4 “On the screen you are going to see a list of words that I’d like you to remember. The  
5 list is quite long, so don’t try to remember all the words from the beginning. That is  
6 why we are going to go through the same list several times, for you to be able to  
7 remember more words each time. Whenever you see a word on the screen please tell  
8 me a sentence containing that word. The sentence can be simple (such as “Cats have  
9 fur”, if the word on the screen is “Cat”), but please make sure you use a different  
10 sentence for each word. After you see the entire list I will ask you to tell me what you  
11 remember from it. The list of words for today will be made out of categories A and  
12 B”.

13 List 1 was presented on the screen, following which participants were asked to Free recall the  
14 words they had learned in any order, whilst being reminded of the categories to which they  
15 belonged:

16 “Now tell me all the words you can remember, in any order”.

17 If participants paused for more than 20 seconds they were asked:

18 “Is that all you can remember?”

19 Upon confirming, FR11 was concluded, and the following instruction was given:

20 “Now we are going to go through the same list of words again just as we did before.

21 Again, tell me a sentence with each word. You can use the same sentence as before”.

1 The second on-screen presentation of List 1 commenced, which was followed by the second  
2 Free recall test (FR12). Using the same instruction, after the test, they were shown the same  
3 list for the third time, which was followed by the distracter task. The instructions for the  
4 distracter task stated:

5 “Before you tell me what you remember, you will play a short game. On the screen,  
6 you are going to see two pictures and I want you to tell me how many differences you  
7 see between them. You will have 2 minutes to tell me as many differences as you  
8 can”.

9 All the differences participants spotted during the task were recorded by the experimenter. At  
10 the end of the 2-minute delay participants were given the same free recall instructions as  
11 before:

12 “Now tell me all the words you can remember, in any order”.

13 If participants paused for more than 20 seconds they were asked:

14 “Is that all you can remember?”

15 If they confirmed, the Session was concluded.

16 **Session 2:** Participants were first administered a surprise free delayed test (FR14) for the list  
17 they studied during Session 1. The instructions for that test were:

18 “Could you tell me what words you remember off the list of Categories A and B you  
19 learned yesterday?”

20 They were allowed to Free recall at their own pace, and the test was concluded if they could  
21 not remember any more words for 20 seconds, as in the previous tests.

1 They were then administered a surprise cued recall test of the same list (CR15). The  
2 instructions for that test were:

3 “Now we are going to do something a bit different. On the screen you are going to see  
4 the first two letters of each of the words you learned in this list. They may help you  
5 remember a few more words. Don’t think about it for too long – if the word comes  
6 immediately to mind, tell me what it is. If it doesn’t, just say Pass.”

7 A second List of words was studied in a process identical to the one in Session 1, whilst  
8 displaying the words on the screen:

9 “Now we are going to go through another list of words just as we did yesterday –  
10 three consecutive times and with sentences. This time the list of words that you will  
11 be learning is made out of Categories A and B”.

12 The remainder of Session 2 had the same instruction as Session 1, while Session 3 had the  
13 same instructions as Session 2.

14
